# Supplementary material
Source: Research Square preprint supplement (doi:10.21203/rs.3.rs-9427797/v1)
Supplement: Supplementary file 2 [file af9352dbf16a120760dac124.docx]

Interview guide – qualitative interview (translated from Swedish)

The overarching aim of the interview is to explore participating parents’ experiences of the program designed to prevent the risk of obsessive-compulsive disorder (OCD) in their children. More specifically, the interview seeks to examine whether parents experienced the program as acceptable, usable, and feasible.

About the interview questions

The interview questions are posed to the participant, and follow‑up questions are asked based on the participant’s responses. Questions aimed at clarifying or elaborating responses are also used (e.g., “*Could you elaborate on what you just said?*” or “*Could you provide additional examples*”), as well as questions to ensure that the interviewer has correctly understood the participant’s account (e.g., “*Do you mean that…?”* or “*Have I understood you correctly?*”). The latter contribute to validating the researcher’s interpretations during the interview.

In line with qualitative interview practice, the interview questions are expected to evolve over the course of the study. The questions presented below should therefore be regarded as a guide and an illustration of the types of topics that may be explored, rather than a fixed or exhaustive set of questions.

Introductory information

*“We will be talking about the parent-guided program designed to prevent the risk of OCD in children, which you have recently completed. I am interested in your experiences of the program, including in what ways it felt acceptable to participate in and whether it was useful for you. We are conducting this interview to better understand how parents experience the program so that we can further develop and improve it. There are no right or wrong answers, what matters are your own experiences and reflections. The interview will take approximately one hour and will be audio‑recorded (audio only). Your responses will be analysed in an anonymised form. Do you have any questions before we begin?”*

Background information

The purpose of these questions is to gain an overview of the participant and to initiate the conversation with relatively straightforward questions.

- What is your role (e.g., parent/guardian)?
- What is your age?
- What is the age of your child?
- How is your family structured?
- Who ones of the adults in the child’s close environment worked with the program?
- Who in the child’s family has had OCD (one or both parents and/or siblings/twin, or none)?
- How did you receive information about the study?
- What led you to sign up for the study? (e.g., reason for seeking support, motivation, recommendation, encouragement from others)

General positive and negative experiences

- Could you describe, in general terms, how you experienced the program?
- What aspects of the program did you perceive as positive?
- Were there any aspects you perceived as negative?
- In what ways, if any, did the program help you in responding to your child in relation to OCD‑related symptoms?
- Can you identify anything in the program that you found particularly helpful?

Experiences of participating in the study

- How did you experience completing the questionnaires (e.g., amount, content)?
- How did you experience completing the knowledge tests before and after the program (e.g., number of questions, content, experience of being assessed)?
- What did you think about the program format, in terms of being delivered online?
- How motivated were you to work independently with the different modules?
- How did it work for you to combine the program with other aspects of your life (e.g., work, family commitments)?
- Approximately how much time did you spend on the program per week? Did this feel reasonable or in line with your expectations?
- What was your experience of working with the modules?
- What did you think about the written materials (e.g., too much/too little, readability, clarity)?
- Did you find the content helpful?
- How did you experience the tasks and exercises (e.g., clarity, comprehensibility, feasibility)?
- What did you think about the different modules?

Welcome, Module 1: OCD and exercises, Module 2: Avoidance and compulsions, Module 3: Family accommodation, Module 4: Progress and moving forward

- Which section(s) did you find most helpful?
- Which section(s) did you find least helpful?
- Which type of device did you primarily use (e.g., mobile phone, computer)?
- Did you need any support from a clinician during the study (via telephone or chat)? If yes, what kind of support did you need? Was the support helpful? Did the amount of support feel sufficient, insufficient, or excessive?

Usability of the program

- Have you been able to use what you learned in the program at home with your child?
- Was anything difficult or complicated to apply or carry out?
- Is there anything you think would have helped you to start using the strategies presented in the program more quickly?
- How do you perceive your ability to help your child based on what you learned in the program?
- Please describe your experience of collaboration or support from other adults in the child’s environment when applying what you learned in the program.

Unmet expectations and suggestions for improvement

- Was there anything you felt was missing from the program or that you would have liked more of?
- If you could change anything about the program, what would that be?
- Is there anything you think could have made the program more useful?
- Is there anything else you would like to add?
